# Supplementary material
Source: PubMed Central journal article supplement (PMC3314723)
Supplement: NIHMS350318-supplement-1.pdf [file NIHMS350318-supplement-1.pdf]

## ONLINE SUPPLEMENT

### **Pyruvate Protects Brain Against Ischemia-Reperfusion Injury by Activating Erythropoietin Signaling Pathway**

*<sup>1</sup>Myoung-Gwi Ryou, Ph.D.; <sup>1</sup>Ran Liu, M.D.; Ming Ren, M.D.; <sup>2</sup>Jie Sun; <sup>2</sup>Robert T. Mallet, Ph.D.;*

*<sup>\*1</sup>Shao-Hua Yang, M.D., Ph.D.*

Departments of <sup>1</sup>Pharmacology & Neuroscience and <sup>2</sup>Integrative Physiology, University of  
North Texas Health Science Center, Fort Worth, 76107, TX, USA

**Research support:** This work was supported by National Institutes of Health grants  
R01NS054687 (SY), R01NS054651 (SY), R01NS076975 (RM) and T32 AG020494 (MR).

**Running title:** Pyruvate-Induced Cerebroprotection

\*Address for correspondence:

Shao-Hua Yang, M.D., Ph.D.

Department of Pharmacology and Neuroscience

University of North Texas Health Science Center

3500 Camp Bowie Blvd

Fort Worth, TX 76107-2699

Tel: 817-735-2250

Fax: 817-735-2091

E-mail: [shaohua.yang@unthsc.edu](mailto:shaohua.yang@unthsc.edu)

## **Supplement materials and methods**

*Immunoblot of hypoxia-responsive proteins.* Contents of HIF-1 $\alpha$ , EPO, Akt/pAkt, and actin were analyzed by immunoblotting of brain extracts and/or cell lysates. Primary antibodies were mouse monoclonal antibodies against HIF-1 $\alpha$ , EPO, Akt/p-Akt, and actin (Santa Cruz Biotechnology). Goat anti-mouse secondary antibody was obtained from Jackson ImmunoResearch (West Grove, PA). Protein bands were quantified (Ultraviolet Products, Upland, CA) and normalized to actin.

*EPO pathway inhibition.* To interrogate the involvement of EPO signaling in the pyruvate cytoprotection, soluble EPO receptor (sEPOR, Sigma) was applied to C6 glial cells (n=10/group) cells. Cells were pretreated for 6h with sEPOR. After H/R, cell viability was determined with calcein AM assay.

## Supplemental Figures

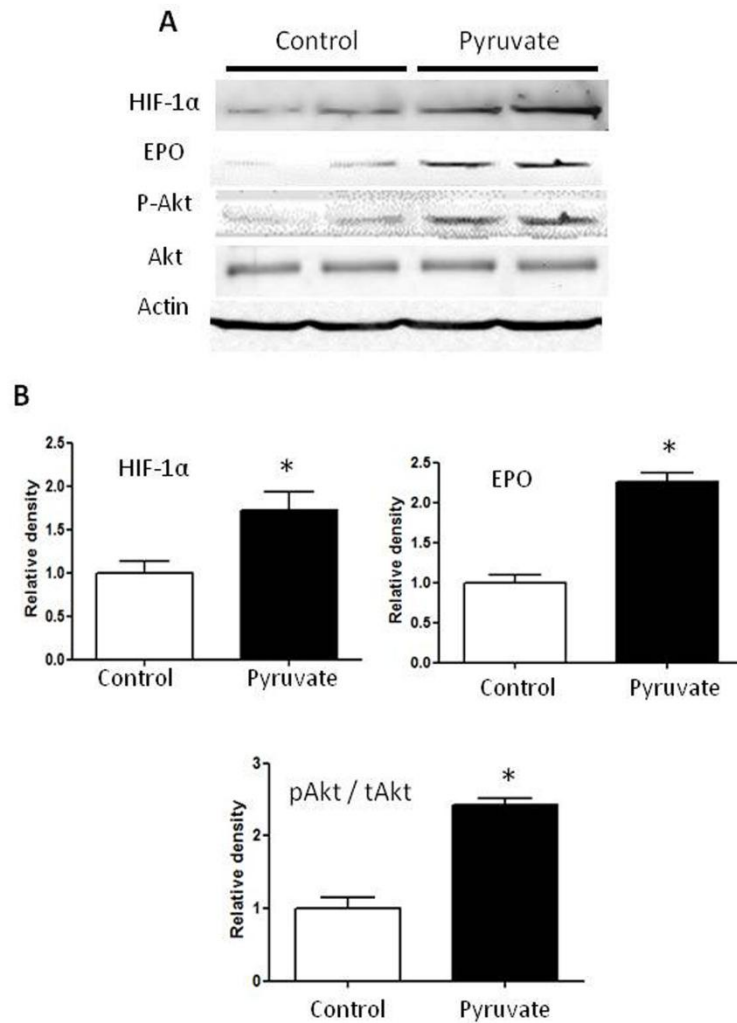

**Figure S1.** HIF-1 $\alpha$ , EPO, and pAkt/Akt protein contents in C6 glioma cells. **A)** 10 mM pyruvate increased expression of HIF-1 $\alpha$ , EPO, and EPOR, in parallel with Akt activation. **B)** Immunoblot band densities in pyruvate-treated cells were normalized to respective controls (\*P<0.05 vs. Control).

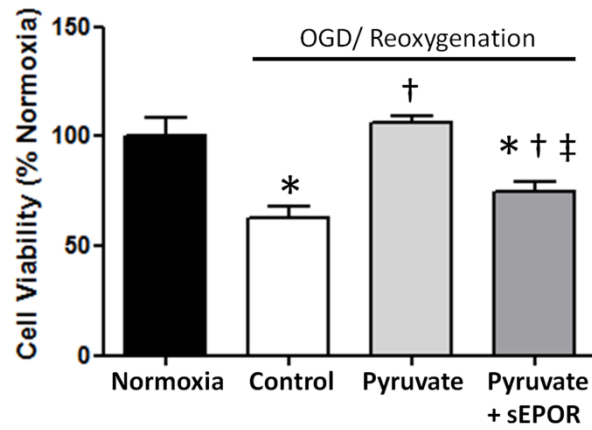

**Figure S2.** Effect of suppression of EPO signaling pathway on cell viability. Interruption of EPO pathway with soluble EPOR dampened pyruvate-induced protection in C6 glioma cells. \* $P < 0.05$  vs. Normoxia; † $P < 0.05$  vs. Control; ‡ $P < 0.05$  vs. Pyruvate.

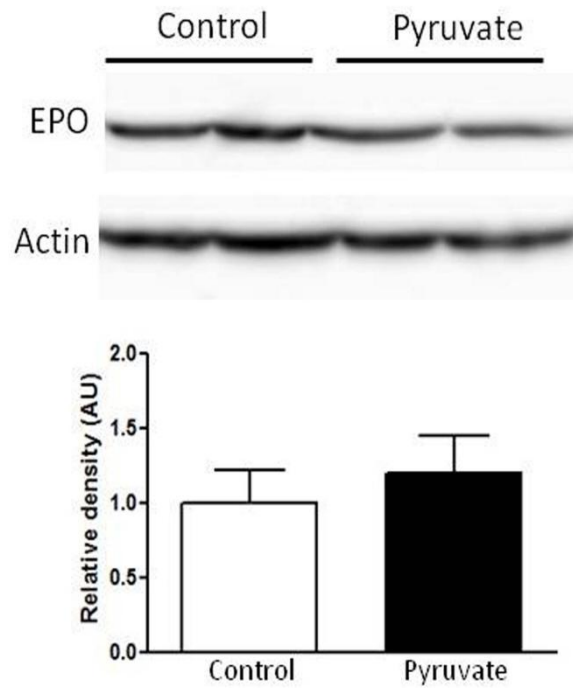

**Figure S3.** Effect of pyruvate infusion on peripheral EPO protein content. Renal EPO protein content was not significantly increased as compared to NaCl infused control group.
